# Supplementary material for: Glycolysis inhibition for synergistic phototherapy of triple-negative breast cancer
Source: Royal Society of Chemistry journal article supplement (doi:10.1039/d3tb02059b), 2023-01-01
Supplement: d3tb02059b1.pdf [file d3tb02059b1.pdf]

1

## Supporting Information

### 2 **Glycolysis Inhibition for Synergistic Phototherapy of Triple-** 3 **Negative Breast Cancer**

4 *Yuqian Fu<sup>a†</sup>, Tingjie Bai<sup>b†</sup>, Panpan Xue<sup>b†</sup>, Qi Chen<sup>a</sup>, Weili Deng<sup>a</sup>, Shuangqian Yan<sup>b\*</sup>,*

5 *Xuemei Zeng<sup>a\*</sup>*

6 <sup>a</sup> Key Laboratory of Microbial Pathogenesis and Interventions of Fujian Province  
7 University, Biomedical Research Center of South China, College of Life Sciences, Fujian  
8 Normal University, 1 Keji Road, Fuzhou 350117, PR China

9 <sup>b</sup> The Straits Institute of Flexible Electronics (SIFE, Future Technologies), The Straits  
10 Laboratory of Flexible Electronics (SLoFE), Fujian Normal University, Fuzhou 350117,  
11 Fujian, China

12 † Y. Fu, T. Bai and P. Xue contributed equally.

13 \* Corresponding authors.

14 E-mail: ifeshqyan@fjnu.edu.cn, xmzeng@fjnu.edu.cn

15

16

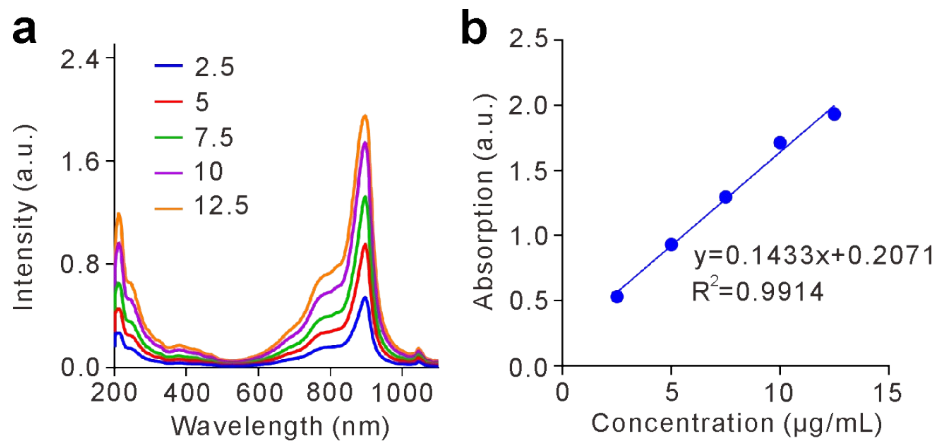

17 **Figure S1.** (a, b) UV-vis absorption spectra of ICG solution (2.5, 5, 7.5, 10, and 15 µg/mL)

18 (a) and its standard curve (b) calculated by absorption at 808 nm from (a).

19

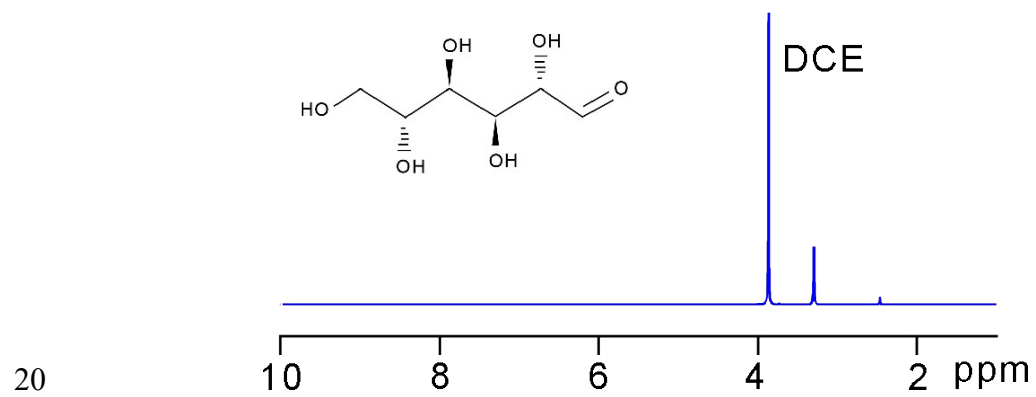

21 **Figure S2.** H1-NMR spectra of supernatant in DMSO-d6.

22

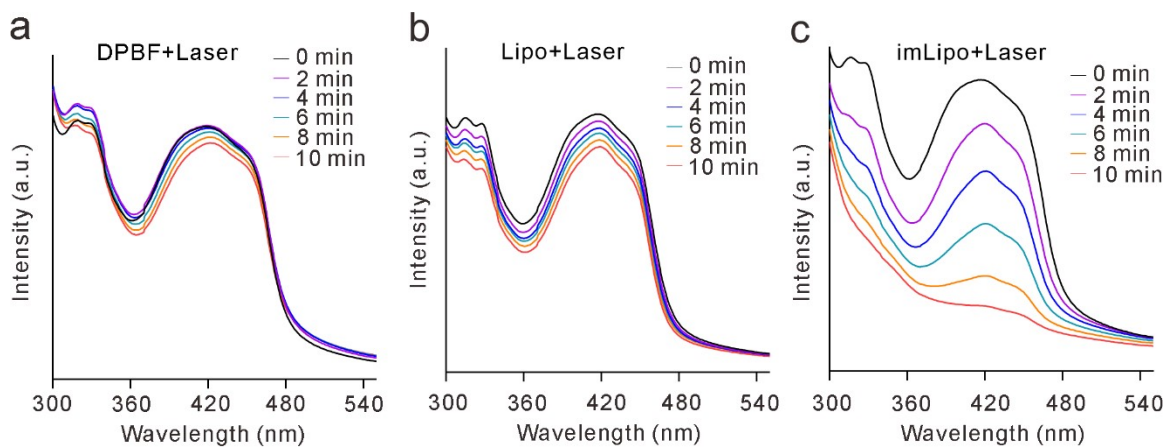

24 **Figure S3.** Evaluation the ROS generation ability of imLipo. (a-c) UV-vis absorbance  
25 spectra of DPBF only (a), DPBF+Lipo (b), and DPBF+imLipo (c) exposed to 808 laser  
26 irradiation for different time points (0, 2, 4, 6, 8, and 10 min). The concentration of Lipo  
27 and imLipo used is 100  $\mu\text{g}/\text{mL}$ .

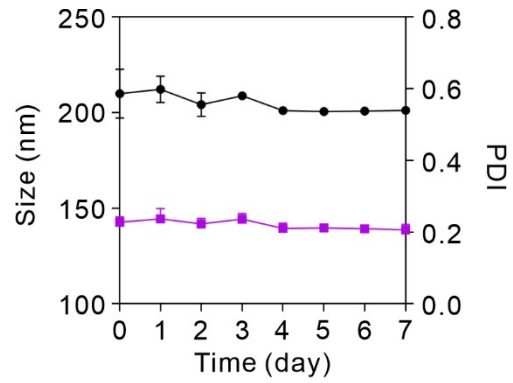

29 **Figure S4.** Colloidal stability of imLipo. The hydrodynamic size and PDI value of imLipo  
30 during storage in PBS buffer supplemented with 10% FBS for different days.

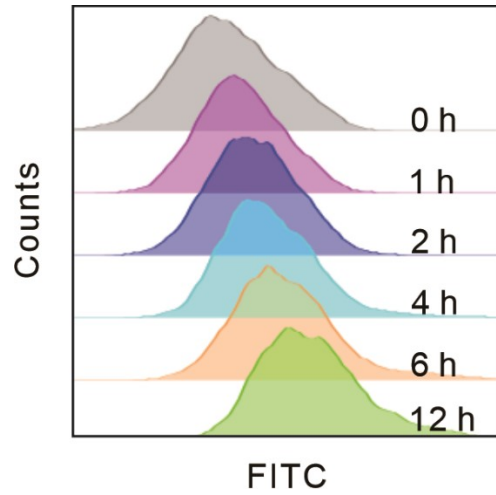

32  
33 **Figure S5.** The fluorescent intensity of 4T1 incubated with 50 µg/mL FITC-imLipo at  
34 various time points (0, 1, 2, 4, 6, and 12 h).  
35  
36

37

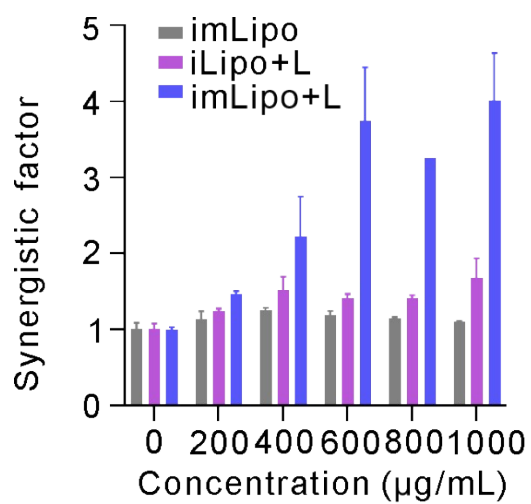

38

39 **Figure S6.** Synergistic factor of imLipo, iLipo+L, and imLipo+L calculated from cell  
40 viability results in Figure 2a, b.

41

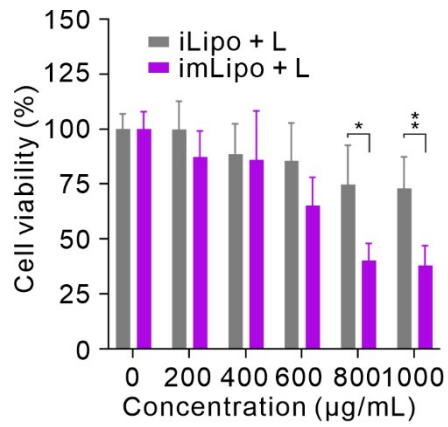

42 **Figure S7.** Cell viability of 4T1 cells incubated with various concentrations of iLipo and  
43 imLipo and exposed to laser illumination (808 nm, 0.5 W/cm<sup>2</sup>, 10 min) in an N<sub>2</sub>  
44 atmosphere.

45



46

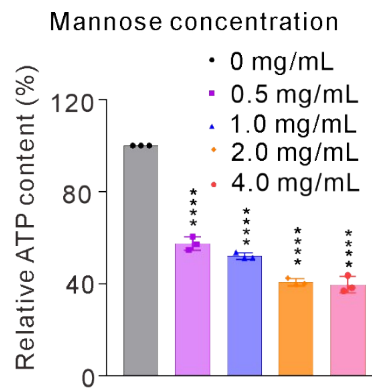

47

48 **Figure S8.** Relative ATP contents of 4T1 cells treated with different concentrations of  
49 mannose for 24 h. \*\*P < 0.01, \*\*\*\*P < 0.0001 and ns: not significant (p > 0.05), analyzed  
50 by one-way ANOVA, followed by Dunnett's multiple comparisons test. Data represent  
51 mean ± s.d.

52

53

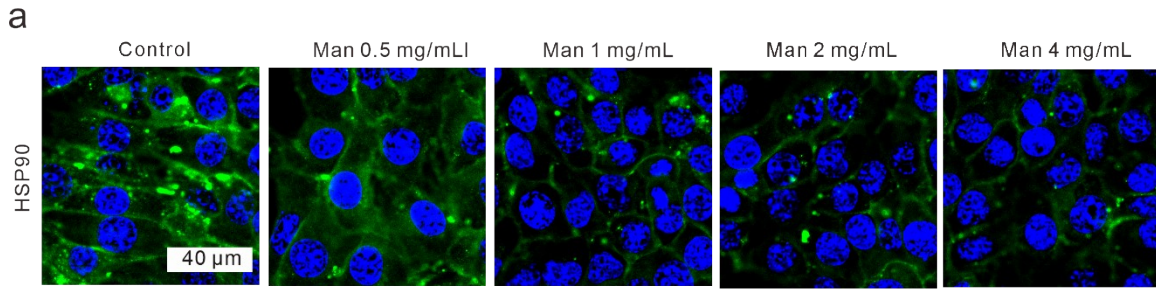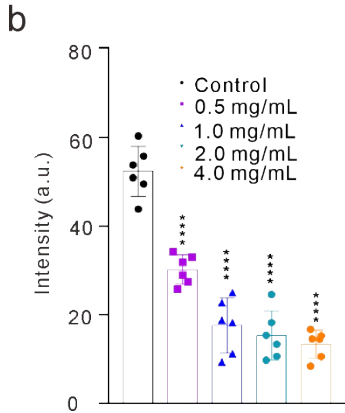

54

55 **Figure S9.** (a) Immunofluorescence images of 4T1 cells treated with different  
56 concentrations of Man for 24 h. Green stained with HSP90, Blue stained with DAPI. Scale  
57 bars are 40  $\mu$ m. (b) Statistical analysis the fluorescent intensity in (a). \*\*P < 0.01, \*\*\*\*P  
58 < 0.0001 and ns: not significant ( $p > 0.05$ ), analyzed by one-way ANOVA, followed by  
59 Dunnett's multiple comparisons test. Data represent mean  $\pm$  s.d.

60

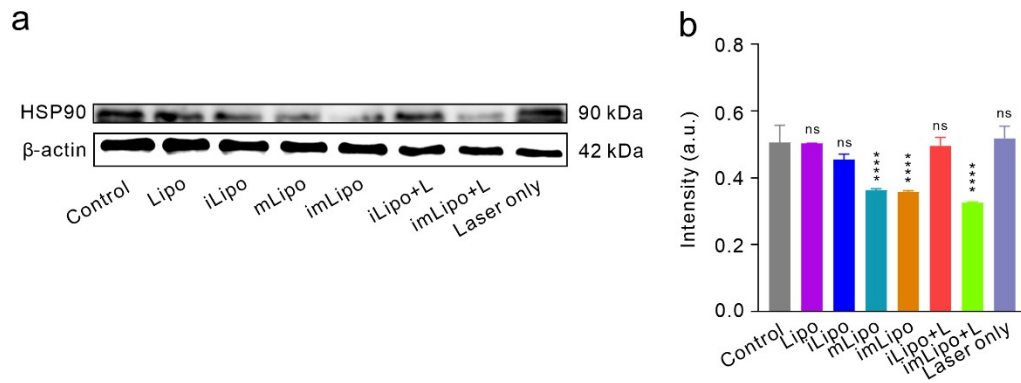

61 **Figure S10.** Western blotting images of HPS90 protein (a) from 4T1 cells received with  
 62 various treatments and corresponding statistical results (b) from a.

63

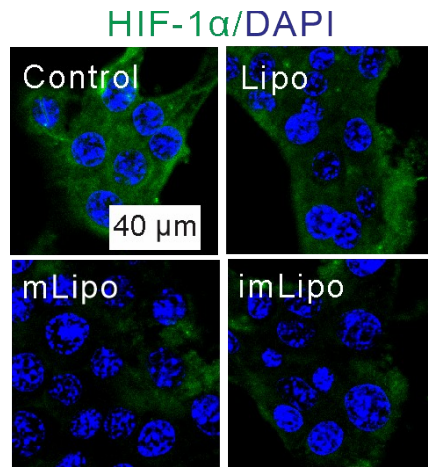

64

65 **Figure S11.** Immunofluorescence images of 4T1 cells incubated with indicated probe (400

66  $\mu\text{g}/\text{mL}$ ) and stained with HIF-1 $\alpha$ . Scale bars are 40  $\mu\text{m}$ .

67

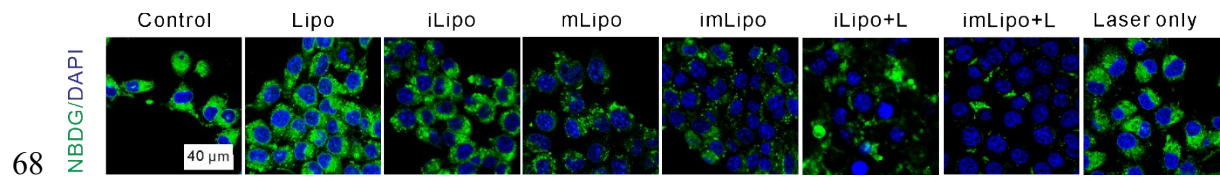

69 **Figure S12.** Fluorescence images of 4T1 cells treated with 400 μg/mL imLipo followed  
70 by laser irradiation and stained with 2-NBDG.

71

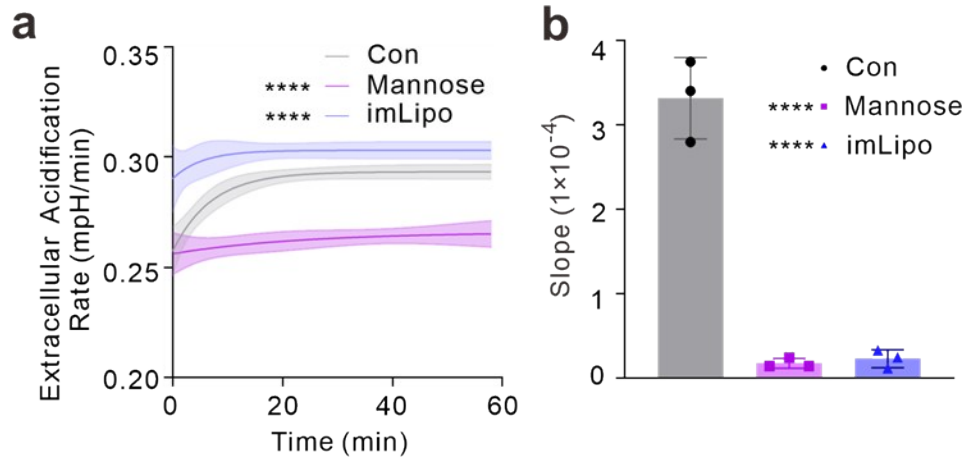

72

73 **Figure S13.** Extracellular acidification rate (a) and slope (b) of 4T1 cells with different  
 74 treatments. The concentration of mannose and imLipo is 400  $\mu\text{g}/\text{mL}$  and 400  $\mu\text{g}/\text{mL}$ . \*\*P  
 75  $< 0.01$ , \*\*\*\*P  $< 0.0001$  and ns: not significant ( $p > 0.05$ ), analyzed by one-way ANOVA,  
 76 followed by Dunnett's multiple comparisons test. Data represent mean  $\pm$  s.d.

77

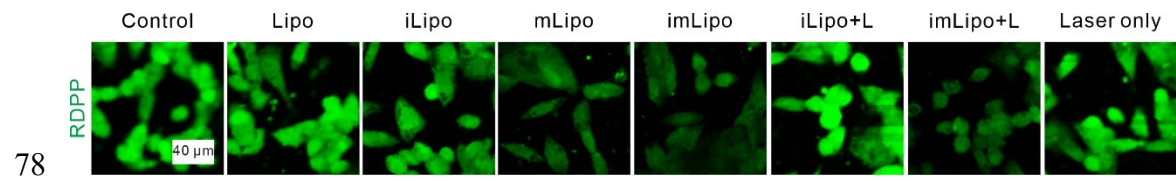

79 **Figure S14.** The fluorescent images of 4T1 treated with indicated treatments and stained  
80 with RDPP. Scale bars are 40  $\mu$ m.

81

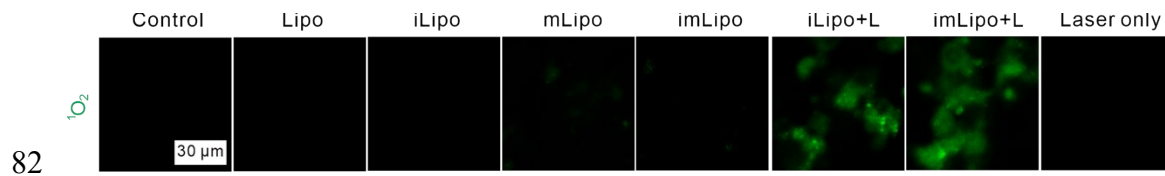

83 **Figure S15.** The fluorescent images of intracellular  $^1\text{O}_2$  of 4T1 cells under various  
84 treatments. The concentration of Lipo, iLipo, mLipo, and imLipo is 400  $\mu\text{g}/\text{mL}$ . Scale  
85 bars are 30  $\mu\text{m}$ .

86

87



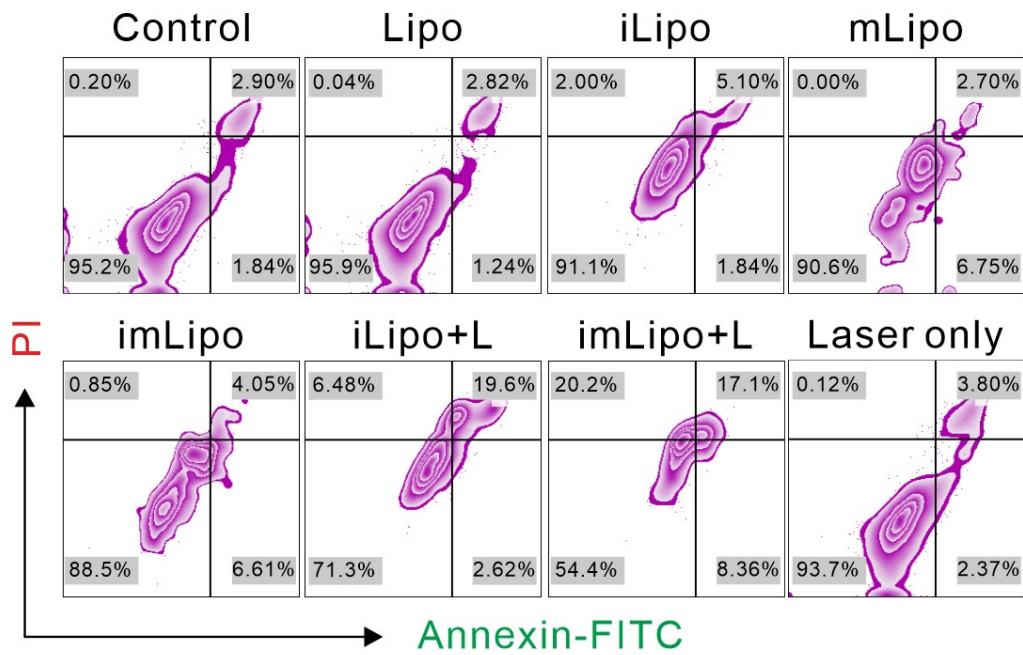

88 **Figure S16.** The apoptosis results of 4T1 cells under various treatments in the N<sub>2</sub>  
 89 atmosphere.

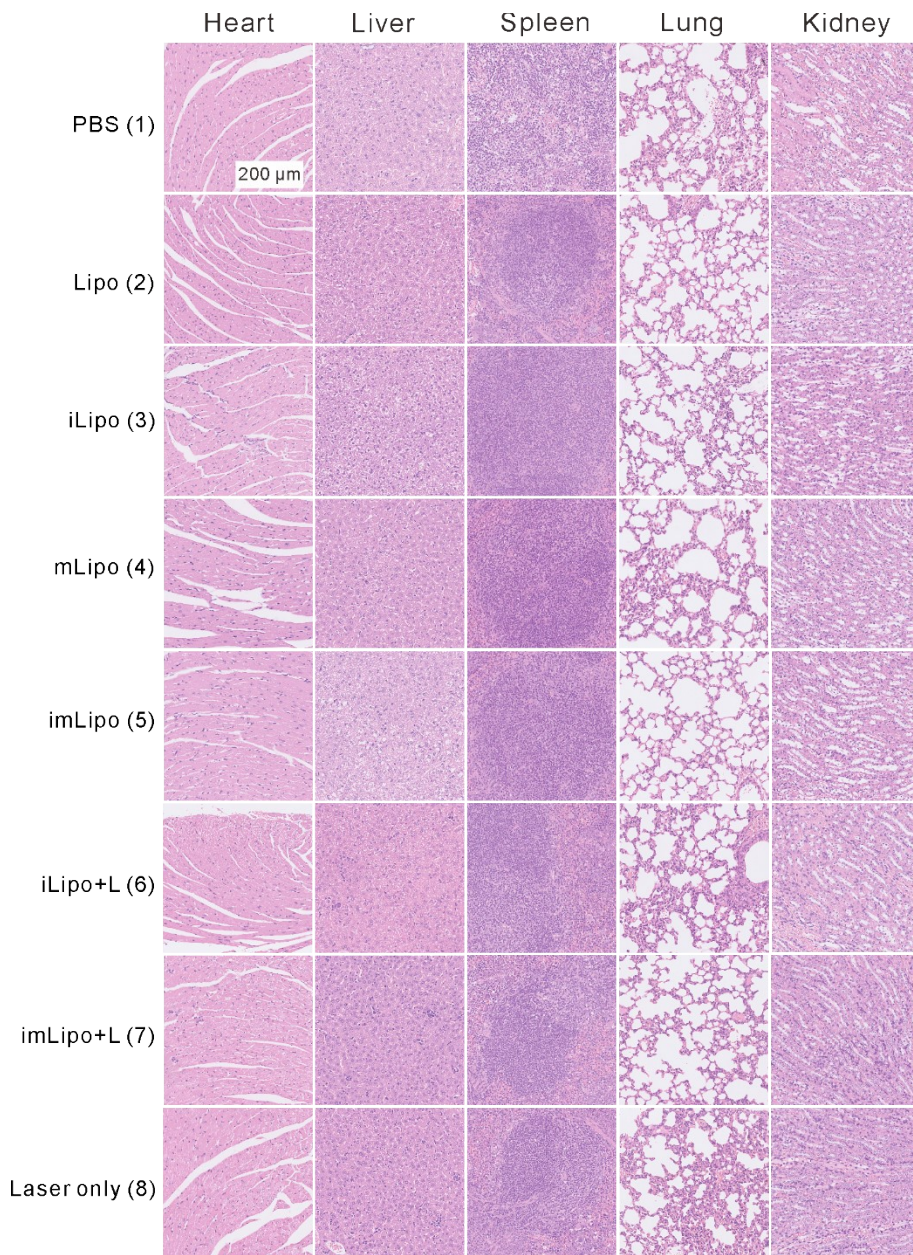

90

91 **Figure S17.** H&E staining images of major organs of mice after receiving different  
92 treatments. Scale bars are 200 μm.

93

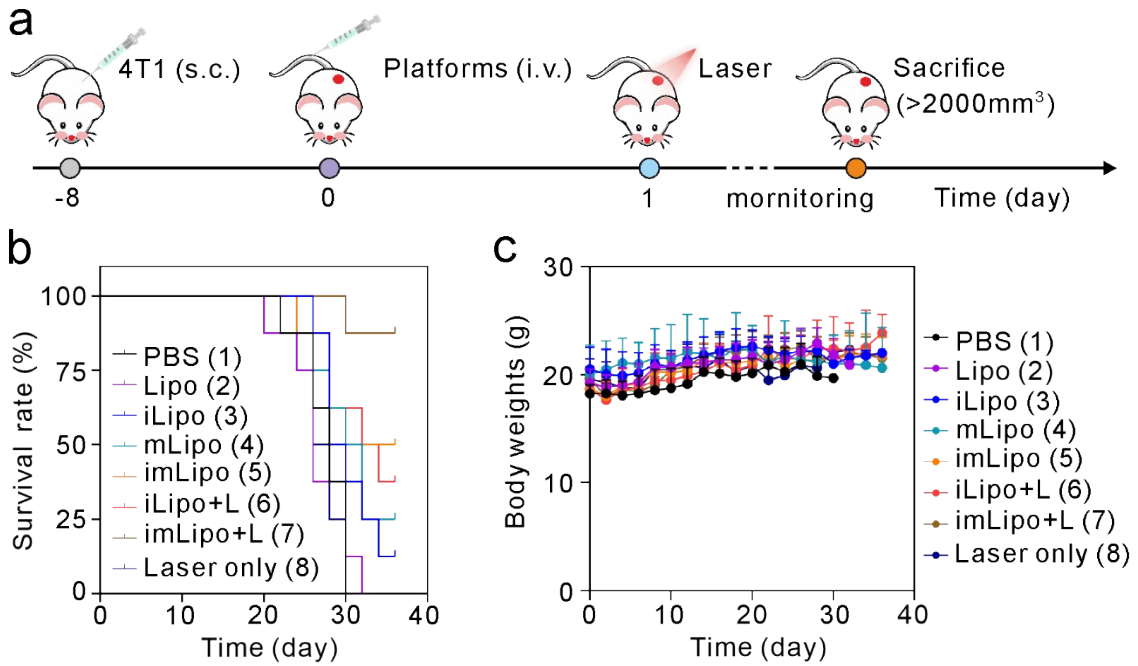

94

95 **Figure S18.** (a) Schematic illustration of tumor therapy. (b, c) Survival rates (b) and body  
 96 weights (c) of mice received various treatments. The usage of injected nanoplatform is 2  
 97 mg per mouse.
